# Supplementary material for: A dehydrated space-weathered skin cloaking the hydrated interior of Ryugu
Source: PubMed Central journal article supplement (PMC9943745; doi:10.1038/s41550-022-01841-6), 2022-12-19
Supplement: 41550_2022_1841_MOESM1_ESM.pdf [file 41550_2022_1841_MOESM1_ESM.pdf]

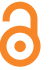

---

# A dehydrated space-weathered skin cloaking the hydrated interior of Ryugu

---

In the format provided by the authors and unedited

**Supplementary Table 1 Fe<sup>3+</sup>/ΣFe ratios in the space-weathered surface and the interior phyllosilicates estimated by various methods.**

| Supplementary Table 1 Fe <sup>3+</sup> /ΣFe ratios in the space-weathered surface and the interior phyllosilicates estimated by various methods. |         |                          |                              |                           |
|--------------------------------------------------------------------------------------------------------------------------------------------------|---------|--------------------------|------------------------------|---------------------------|
| Sample No.                                                                                                                                       | Chamber | Targets                  | Fe <sup>3+</sup> /ΣFe ratios | Methods                   |
| A0104-02306901                                                                                                                                   | A       | Interior phyllosilicates | ~0.85                        | Fe L <sub>2,3</sub> ELNES |
| A0104-02306901                                                                                                                                   | A       | Smooth layer             | ~0.45                        | Fe L <sub>2,3</sub> ELNES |
| C0105-030003701                                                                                                                                  | C       | Interior phyllosilicates | ~0.95                        | Fe L <sub>2,3</sub> ELNES |
| C0105-030003701                                                                                                                                  | C       | Frothy layer             | ~0.20                        | Fe L <sub>2,3</sub> ELNES |
| A0058-C2001-02                                                                                                                                   | A       | Interior phyllosilicates | ~0.60                        | Fe L <sub>2,3</sub> XANES |
| A0058-C2001-02                                                                                                                                   | A       | Frothy layer             | ~0                           | Fe L <sub>2,3</sub> XANES |
| A0058-C2001-03                                                                                                                                   | A       | Interior phyllosilicates | ~0.70                        | Fe L <sub>2,3</sub> ELNES |
| A0058-C2001-03                                                                                                                                   | A       | Frothy layer             | ~0.30                        | Fe L <sub>2,3</sub> ELNES |
| A0058-C2001-08                                                                                                                                   | A       | Interior phyllosilicates | ~0.40                        | Fe K XANES                |
| A0058-C2001-08                                                                                                                                   | A       | Frothy layer             | ~0.15                        | Fe K XANES                |

ELNES: energy loss near edge structure. XANES: X-ray absorption near edge structure.
